# Supplementary material
Source: PubMed Central journal article supplement (PMC4201129)
Supplement: supp_114.060194_supplemental_figure_60194.pdf [file supp_114.060194_supplemental_figure_60194.pdf]

# Cytochrome P450 3A5 Genotype Impacts Maraviroc Concentrations in Healthy Volunteers

Yanhui Lu, Edward J. Fuchs, Craig W. Hendrix, and Namandjé N. Bumpus

## Drug Metabolism and Disposition

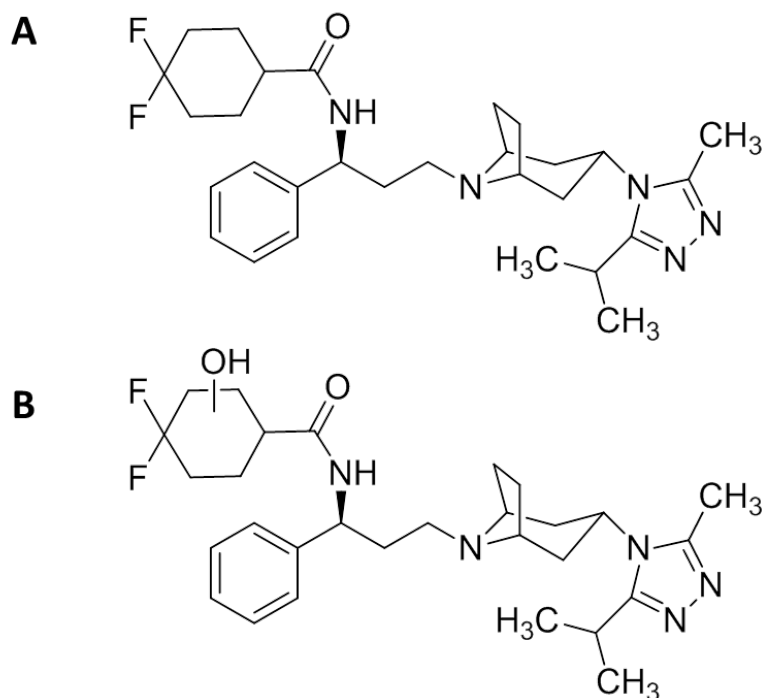

**Supplementary Figure 1.** Chemical structures of (A) maraviroc and (B) the mono-oxygenated metabolite M1 as previously reported (Lu et al., 2012).

## References

Lu Y, Hendrix CW, and Bumpus NN (2012) Cytochrome P450 3A5 plays a prominent role in the oxidative metabolism of the anti-human immunodeficiency virus drug maraviroc.

*Drug metabolism and disposition: the biological fate of chemicals* **40**:2221-2230.
